# Supplementary material
Source: Copernicus journal article supplement (doi:10.5194/egusphere-2026-3269)
Supplement: Supplementary file 1 [file egusphere-2026-3269-supplement.pdf]

# Supplementary materials: Can bias correction methods improve the statistical characterization of extreme rainfall compound events in climate simulations?

Grégoire Jacquemin, Mathieu Vrac, Xavier Freulon, Denis Allard

June 5, 2026

## S1 Figures

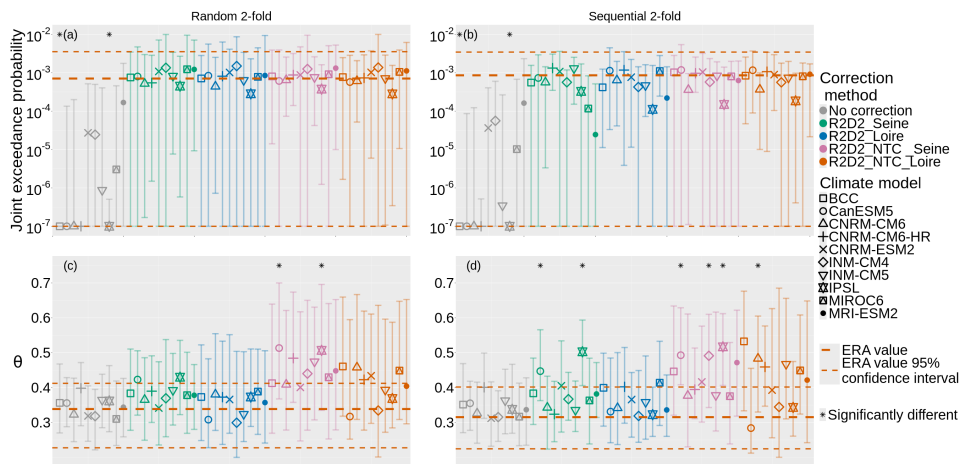

Figure S1: Joint exceedance probability (top) and bivariate extremal index  $\theta$  (bottom) for the Seine/Loire event over the reference period (1992-2021). Left: random 2-fold experiment; Right: sequential 2-fold experiment. The focus is made on R<sup>2</sup>D<sup>2</sup> and R<sup>2</sup>D<sup>2</sup>\_NTC with both the *API* of the Seine and the *API* of the Loire as the pivot.
